# Supplementary material for: Analytical method for metabolites involved in biosynthesis of plant volatile compounds
Source: Royal Society of Chemistry journal article supplement (doi:10.1039/c7ra00766c), 2017-01-01
Supplement: c7ra00766c1.pdf [file c7ra00766c1.pdf]

## SUPPLEMENTARY INFORMATION

### **Analytical method for metabolites involved in biosynthesis of plant volatile compounds**

Xiumin Fu <sup>a,#</sup>, Ying Zhou <sup>a,#</sup>, Lanting Zeng <sup>a</sup>, Fang Dong <sup>b</sup>, Xin Mei <sup>a</sup>, Yinyin Liao <sup>a</sup>, Naoharu Watanabe <sup>c</sup> and Ziyin Yang <sup>a,\*</sup>

---

<sup>a</sup> *Key Laboratory of South China Agricultural Plant Molecular Analysis and Genetic Improvement & Guangdong Provincial Key Laboratory of Applied Botany, South China Botanical Garden, Chinese Academy of Sciences, Xingke Road 723, Tianhe District, Guangzhou 510650, China*

<sup>b</sup> *Guangdong Food and Drug Vocational College, Longdongbei Road 321, Tianhe District, Guangzhou 510520, China*

<sup>c</sup> *Graduate School of Science and Technology, Shizuoka University, 3-5-1 Johoku, Naka-ku, Hamamatsu 432-8561, Japan*

<sup>#</sup> *Co-first authors.*

<sup>\*</sup>*Corresponding author. Ziyin Yang, Tel: +86-20-38072989, Email address: [zyyang@scbg.ac.cn](mailto:zyyang@scbg.ac.cn).*

**Supplemental Table S1 The methods for analysis of metabolites involved in biosynthesis of plant volatile compounds**

| Metabolites                                                                 |         | Analysis methods           | Advantage                                                                                          | Disadvantage                                                                  | Ref                    |
|-----------------------------------------------------------------------------|---------|----------------------------|----------------------------------------------------------------------------------------------------|-------------------------------------------------------------------------------|------------------------|
| ① Metabolites involved in glycolysis and pentose phosphate pathway          | G6P     | Spectrophotometer analysis | ● low cost and easy analysis                                                                       | ● imprecision                                                                 | S1, S2, S3, S4, S5, S6 |
|                                                                             | F6P     |                            |                                                                                                    |                                                                               |                        |
|                                                                             | FBP     | GC-MS                      | ● high sensitivity<br>● high reliability                                                           | ● requirement for derivatization                                              |                        |
|                                                                             | PEP     |                            |                                                                                                    |                                                                               |                        |
| ② Metabolites involved in formation of volatile phenylpropanoids/benzenoids | Pyr     |                            |                                                                                                    |                                                                               | S7, S8, S9, S10        |
|                                                                             | 3PG     | LC-MS                      | ● wide analytical range of metabolites                                                             | ● lower reproducibility of retention times<br>● lower accurate quantification |                        |
|                                                                             | 2PG     |                            |                                                                                                    |                                                                               |                        |
|                                                                             | DHAP    |                            |                                                                                                    |                                                                               |                        |
|                                                                             | GAP     |                            |                                                                                                    |                                                                               |                        |
|                                                                             | 3PG+2PG |                            |                                                                                                    |                                                                               |                        |
|                                                                             | 1,3-PBG | CE-MS                      | ● small quantity of sample<br>● without derivatization step<br>● high mass accuracy and resolution | ● poor migration time<br>● reproducibility<br>● lack of reference libraries   |                        |
| orgainc acid                                                                | GC-MS   | ● high sensitivity         | ● requirement for derivatization                                                                   |                                                                               |                        |
| 3-deoxy-arabino-heptulonate 7-phosphate                                     |         |                            |                                                                                                    |                                                                               |                        |
| 3-dehydroquinic acid                                                        |         |                            |                                                                                                    |                                                                               |                        |
| 3-dehydroshikimic acid                                                      |         |                            |                                                                                                    |                                                                               |                        |
| shikimic acid                                                               |         |                            |                                                                                                    |                                                                               |                        |
| shikimate 3-phosphate                                                       |         |                            |                                                                                                    |                                                                               |                        |
| 5-enolpyruvylshikimate-3-phosphate (EPSP)                                   |         |                            |                                                                                                    |                                                                               |                        |
| chorismic acid                                                              |         |                            |                                                                                                    |                                                                               |                        |
| prephenic acid                                                              | S2      |                            |                                                                                                    |                                                                               |                        |

|                                                                               |                                                                                                                                                         |          |                                                                                                                                                    |                                                                                                                                                             |                         |
|-------------------------------------------------------------------------------|---------------------------------------------------------------------------------------------------------------------------------------------------------|----------|----------------------------------------------------------------------------------------------------------------------------------------------------|-------------------------------------------------------------------------------------------------------------------------------------------------------------|-------------------------|
|                                                                               | phenylpyruvate<br><i>trans</i> -cinnamic acid<br><i>para</i> -coumaric acid<br>3-hydroxy-3-phenylpropionic acid<br>amino acid                           | HPLC-PDA | <ul style="list-style-type: none"> <li>● low cost and easy analysis</li> <li>● direct analysis</li> </ul>                                          | <ul style="list-style-type: none"> <li>● limited compounds detected</li> <li>● poor separation</li> </ul>                                                   |                         |
|                                                                               | L-phenylalanine<br>phenolic acid conjugated coenzyme A<br><i>trans</i> -cinnamoyl CoA<br>3-hydroxy-3-phenylpropionyl CoA<br>3-oxo-3-phenylpropionyl CoA | HPLC-MS  | <ul style="list-style-type: none"> <li>● direct analysis</li> </ul>                                                                                | <ul style="list-style-type: none"> <li>● requirement for sample clean-up</li> </ul>                                                                         |                         |
|                                                                               |                                                                                                                                                         | CE-MS    | <ul style="list-style-type: none"> <li>● simple extraction process</li> <li>● short analytical time</li> <li>● small quantity of sample</li> </ul> | <ul style="list-style-type: none"> <li>● lower sensitivity</li> </ul>                                                                                       |                         |
| ③ <b>Metabolites involved in formation of volatile fatty acid derivatives</b> | unsaturated fatty acid<br>linoleic acid<br>linolenic acid<br>saturated fatty acid                                                                       | GC       | <ul style="list-style-type: none"> <li>● high sensitivity</li> <li>● short analytical time</li> </ul>                                              | <ul style="list-style-type: none"> <li>● lower accurate quantitative</li> <li>● requirement for derivatization</li> <li>● time-consuming</li> </ul>         | S11, S12, S13, S14, S15 |
|                                                                               |                                                                                                                                                         | HPLC     | <ul style="list-style-type: none"> <li>● accurate quantitative analysis</li> </ul>                                                                 | <ul style="list-style-type: none"> <li>● poor retention time reproducibility</li> <li>● requirement for derivatization</li> <li>● time-consuming</li> </ul> |                         |

|                                                                                  |                                                                                                                                                               |         |                                                                                                                             |                                                                                                                                   |                    |
|----------------------------------------------------------------------------------|---------------------------------------------------------------------------------------------------------------------------------------------------------------|---------|-----------------------------------------------------------------------------------------------------------------------------|-----------------------------------------------------------------------------------------------------------------------------------|--------------------|
|                                                                                  |                                                                                                                                                               | LC-MS   | <ul style="list-style-type: none"> <li>● without derivatization step</li> <li>● requirement for MS equipment</li> </ul>     |                                                                                                                                   |                    |
|                                                                                  | 13-Hydroperoxylinolenic acid<br>(12, 13S)-epoxylinolenic acid<br>octadecanoid 12-oxo-phytodienoic acid<br>Jasmonic acid                                       | GC-MS   | <ul style="list-style-type: none"> <li>● high sensitivity</li> </ul>                                                        | <ul style="list-style-type: none"> <li>● requirement for derivatization</li> </ul>                                                | S16, S17, S18, S19 |
|                                                                                  |                                                                                                                                                               | LC-MS   | <ul style="list-style-type: none"> <li>● direct analysis</li> </ul>                                                         | <ul style="list-style-type: none"> <li>● unavailable of internal standards</li> </ul>                                             |                    |
| ④ <b>Glycosidically bound volatile compounds</b>                                 | Depend on plant species, such as glycosides constituting aglycons of the 3-hexenol, benzyl alcohol, 2-phenylethanol, methyl salicylate, geraniol and linalool | GC-MS   | <ul style="list-style-type: none"> <li>● easy to identify the structures of aglycone</li> </ul>                             | <ul style="list-style-type: none"> <li>● requirement for derivatization</li> <li>● hard to identify the sugar residues</li> </ul> | S20, S21, S22      |
|                                                                                  |                                                                                                                                                               | LC-MS   | <ul style="list-style-type: none"> <li>● direct analysis</li> </ul>                                                         | <ul style="list-style-type: none"> <li>● hard to obtain internal standards</li> <li>● more purification steps</li> </ul>          |                    |
| ⑤ <b>Metabolites involved in formation of carotenoid derived aroma compounds</b> | Phytoene<br>Lycopene<br>$\beta$ -carotene<br>$\delta$ -carotene                                                                                               | LC-PDA  | <ul style="list-style-type: none"> <li>● well separation</li> <li>● fast detection of known carotenoid compounds</li> </ul> | <ul style="list-style-type: none"> <li>● complex elution gradient program</li> <li>● long analysis time</li> </ul>                | S23, S24           |
|                                                                                  |                                                                                                                                                               | UPLC-MS | <ul style="list-style-type: none"> <li>● reduction in analysis time and mobile phase solvent</li> </ul>                     | <ul style="list-style-type: none"> <li>● poor separation</li> <li>● requirement for MS equipment</li> </ul>                       |                    |

---

|                                                                    |                             |         |                                                                                                                   |                     |          |
|--------------------------------------------------------------------|-----------------------------|---------|-------------------------------------------------------------------------------------------------------------------|---------------------|----------|
|                                                                    |                             |         | <ul style="list-style-type: none"> <li>● consumption</li> <li>● identification for unknown carotenoids</li> </ul> |                     |          |
| ⑥ <b>Metabolites involved in formation of volatile isoprenoids</b> | DMAPP<br>GPP<br>FPP<br>GGPP | CE      | <ul style="list-style-type: none"> <li>● well separating isoprenoids</li> <li>● direct analysis</li> </ul>        | ● lower sensitivity | S25, S26 |
|                                                                    |                             | HPLC-MS | <ul style="list-style-type: none"> <li>● high sensitivity</li> <li>● direct detection</li> </ul>                  |                     |          |

---

#### References

- S1. Y. C. Du, A. Nose, K. Wasano and Y. Uchida, *Funct. Plant Biol.*, 1998, **25**, 253.
- S2. R. C. Leegood and R. T. Furbank, *Planta*, 1984, **162**, 450.
- S3. H. Usuda, M. Ku and G. Edwards, *Funct. Plant Biol.*, 1984, **11**, 509.
- S4. J. Liseč, N. Schauer, J. Kopka, L. Willmitzer and A. R. Fernie, *Nat. Protocols*, 2006, **1**, 387.
- S5. H. Yamakawa and M. Hakata, *Plant and Cell Physiol.*, 2010, **51**, 795.
- S6. B. Luo, K. Groenke, R. Takors, C. Wandrey and M. Oldiges, *J. Chromatogr. A*, 2007, **1147**, 153.
- S7. P. Oliveira, J. A. Pereira, P. B. Andrade, P. Valentão, R. M. Seabra and B. M. Silva, *Food Chem.*, 2008, **111**, 393.
- S8. Magnes, M. Suppan, T. R. Pieber, T. Moustafa, M. Trauner, G. Haemmerle and F. M. Sinner, *Anal. Chem.*, 2008, **80**, 5736.
- S9. Mardones, A. Hitschfeld, A. Contreras, K. Lepe, L. Gutiérrez and D. von Baer, *J. Chromatogr. A*, 2005, **1085**, 285.
- S10. W. Klampfl, W. Buchberger and P. R. Haddad, *J. Chromatogr. A*, 2000, **881**, 357.
- S11. B. Qi, T. Fraser, S. Mugford, G. Dobson, O. Sayanova, J. Butler, J. A. Napier, A. K. Stobart and C. M. Lazarus, *Nat. Biotech.*, 2004, **22**, 739.
- S12. J. Browse, P. J. McCourt and C. R. Somerville, *Anal. Biochem.*, 1986, **152**, 141.
- S13. S.H. Chen and Y.-J. Chuang, *Anal. Chim. Acta*, 2002, **465**, 145.
- S14. T. Řezanka, *J. High. Resolut. Chromatogr.*, 2000, **23**, 338
- S15. A. Carrier and J. Parent, *J. Liq. Chromatogr. Rel. Technol.*, 2001, **24**, 97.

- S16. A. Müller, P. Düchting and E. W. Weiler, *Planta*, 2002, **216**, 44.
- S17. M. J. Mueller and W. Brodschelm, *Anal. Biochem.*, 1994, **218**, 425.
- S18. B. A. Stelmach, A. Müller, P. Hennig, D. Laudert, L. Andert and E. W. Weiler, *Phytochemistry*, 1998, **47**, 539.
- S19. M. O. Funk, R. Isaac and N. A. Porter, *Lipids*, 1976, **11**, 113.
- S20. Y. Zhou, F. Dong, A. Kunimasa, Y. Zhang, S. Cheng, J. Lu, L. Zhang, A. Murata, F. Mayer, P. Fleischmann, N. Watanabe and Z. Yang, *J. Agric. Food Chem.*, 2014, **62**, 8042.
- S21. C. C. Chyau, P. T. Ko, C. H. Chang and J. L. Mau, *Food Chem.*, 2003, **80**, 387.
- S22. Y. Z. Gunata, C. L. Bayonove, R. L. Baumes and R. E. Cordonnier, *J. Chromatogr. A*, 1985, **331**, 83.
- S23. P. D. Fraser, M. E. Pinto, D. E. Holloway and P. M. Bramley, *Plant J.*, 2000, **24**, 551.
- S24. B. Y. Hsu, Y. S. Pu, B. S. Inbaraj and B. H. Chen, *J. Chromatogr. B*, 2012, **899**, 36.
- S25. G. Nürenberg and D. A. Volmer, *Anal. Bioanal. Chem.*, 2012, **402**, 671.
- S26. L. Henneman, A. G. van Cruchten, S. W. Denis, M. W. Amolins, A. T. Placzek, R. A. Gibbs, W. Kulik and H. R. Waterham, *Anal. Biochem.*, 2008, **383**, 18.
